1 **Title:** The gut microbiota is associated with clearance of *Clostridium difficile* infection  
2 independent of adaptive immunity

3  
4 **Running Title:** Microbiota and *C. difficile* clearance

5  
6  
7 **Authors:**  
8 Jhansi L. Leslie<sup>1\*</sup>, Kimberly C. Vendrov<sup>2</sup>, Matthew L. Jenior<sup>1\*</sup> and Vincent B. Young<sup>1,2#</sup>  
9

10  
11 **Affiliations**  
12 <sup>1</sup>Department of Microbiology and Immunology  
13 <sup>2</sup>Department of Internal Medicine, Division of Infectious Diseases  
14 University of Michigan Medical School  
15 Ann Arbor, Michigan  
16 # Corresponding author  
17 youngvi@med.umich.edu  
18

19  
20 **Present address**  
21 \*Department of Medicine, Division of Infectious Diseases and International Health  
22 (JLL)  
23 Department of Biomedical Engineering (MLJ)  
24 University of Virginia  
25 Charlottesville, Virginia  
26

27 **Word count:**

28 Abstract: 176

29 Importance: 108

30 Main text : 2753

31

32

33

34

35 **Abstract**

36  
37 *Clostridium (Clostridioides) difficile*, a Gram-positive, anaerobic bacterium is the leading single  
38 cause of nosocomial infections in the United States. A major risk factor for *C. difficile* infection  
39 (CDI) is prior exposure to antibiotics as they increase susceptibility to CDI by altering the  
40 membership of the microbial community enabling colonization. The importance of the gut  
41 microbiota in providing protection from CDI is underscored by the reported 80-90% success rate  
42 of fecal microbial transplants in treating recurrent infection. Adaptive immunity, specifically  
43 humoral immunity, is also sufficient to protect from both acute and recurrent CDI. However, the  
44 role of the adaptive immune system in mediating clearance of *C. difficile* has yet to be resolved.  
45 Using murine models of CDI, we found that adaptive immunity is dispensable for clearance of *C.*  
46 *difficile*. However, Random Forest analysis using only 2 members of the resident bacterial  
47 community correctly identified animals that would go on to clear the infection with 66.7%  
48 accuracy. These findings indicate that the indigenous gut microbiota independent of adaptive  
49 immunity facilitates clearance of *C. difficile* from the murine gastrointestinal tract.

50 **Importance**

51 *C. difficile* infection is a major cause of morbidity and mortality in hospitalized patients in the  
52 United States. Currently the role of the adaptive immune response in modulating levels of *C.*  
53 *difficile* colonization is unresolved. This work suggests that the indigenous gut microbiota is a  
54 main factor that promotes clearance of *C. difficile* from the GI tract. Our results show that  
55 clearance of *C. difficile* can occur without contributions from the adaptive immune response.  
56 This study also has implications for the design of preclinical studies testing the efficacy of  
57 vaccines on clearance of bacterial pathogens as inherent differences in the baseline community  
58 structure of animals may bias findings.

59 **Introduction.**

60 Human disease due to anaerobic bacterium *Clostridium (Clostridioides) difficile* is a  
61 significant cause of morbidity and mortality in the US with an estimated 500,000 cases in the  
62 U.S. yearly (1). A major risk factor for *C. difficile* infection (CDI) is prior exposure to antibiotics  
63 (2). Antibiotics increase susceptibility to CDI by altering the membership of the microbial  
64 community and thus the metabolome of the gut, enabling colonization (3). Colonization with *C.*  
65 *difficile* can manifest in a range of clinical syndromes ranging from asymptomatic colonization  
66 to inflammatory colitis characterized by diarrhea with abdominal pain, and in severe cases,  
67 death. In addition to primary infection, one in five patients treated for CDI experiences recurrent  
68 disease (1).

69 Disease is primarily mediated by the production of two toxins, TcdA and TcdB, which  
70 are the major virulence factors for *C. difficile* (4). TcdA and TcdB are large multi-domain  
71 proteins, which inactivate cellular rho-family GTPases via the addition of a glucose molecule  
72 (5). Inactivation of these key regulatory proteins in epithelial cells results in disruption of tight  
73 junctions, increased paracellular flow, and eventually leads to cell death (6, 7).

74 The importance of the gut microbiota in providing protection from CDI is underscored by  
75 the reported 80-90% success rate of fecal microbial transplants in preventing recurrent infection  
76 (8-10). Other than microbiome-mediated prevention of colonization, adaptive immunity is also  
77 sufficient to provide protection from both acute and recurrent CDI likely via antibody-mediated  
78 neutralization of *C. difficile* toxins TcdA and TcdB (11-14). However, the role of the adaptive  
79 immune system in modulating *C. difficile* colonization has yet to be resolved.

80 In this study we sought to determine if adaptive immunity plays a role in clearance of *C.*  
81 *difficile* colonization. We found clearance of *C. difficile* can occur in the absence of adaptive

82 immunity. Furthermore, the indigenous microbial community membership that exists prior to  
83 antibiotic administration and infection was predictive of which animal went on to clear the  
84 infection.

85

## 86 **Results.**

### 87 **Clearance of *C. difficile* can occur in the absence of adaptive immune responses.**

88 We sought to determine the contribution of adaptive immunity in clearance of *C. difficile*.  
89 To test this, we compared *C. difficile* infection in wild-type mice (WT) to RAG1<sup>-/-</sup> mice, which  
90 lack both B and T cells. As the two genotypes of mice were derived from separate colonies and  
91 others have reported that RAG1<sup>-/-</sup> mice have a distinct microbial community from WT mice, we  
92 co-housed the RAG1<sup>-/-</sup> mice with WT mice for over three weeks. Co-housing normalized the WT  
93 and RAG1<sup>-/-</sup> mice fecal communities such that they were not significantly different, ANOSIM  
94  $p=0.087$  (figure 1A). Both groups of mice were pretreated with antibiotics, separated into cages  
95 based on genotype, then challenged with *C. difficile* strain 630. Although all mice were initially  
96 colonized, within three weeks of challenge, animals in two cages cleared *C. difficile* while the  
97 remaining animals were persistently colonized (figure 1B). Notably, the mice that cleared the  
98 infection were WT and RAG1<sup>-/-</sup>. Clearance or persistence colonization with *C. difficile* did not  
99 correspond to genotype but rather to co-housing group. Reanalyzing the pre-antibiotic microbial  
100 communities by co-housing group rather than genotype, we found that the mice that eventually  
101 cleared *C. difficile* had significantly distinct community compared to the mice that remained  
102 colonized ASOSIM  $p= 0.047$  (figure 1C). These results demonstrate that clearance of *C. difficile*  
103 can occur independently of adaptive immunity.

104 **Reconstitution of IgG anti-toxin antibody is not sufficient to clear *C. difficile*.**

105 To mitigate any effect inherent baseline differences in the microbiota of WT and RAG1<sup>-/-</sup>  
106 mice, we tested if adaptive immunity is sufficient to clear *C. difficile* by reconstituting RAG1<sup>-/-</sup>  
107 mice with splenocytes from WT mice. Reports of immunization with various *C. difficile* antigen  
108 suggests that antibodies to these antigens may decrease colonization so we additionally tested if  
109 transfer of cells from mice immunized via natural infection with *C. difficile* might facilitate  
110 clearance (15, 16). Splenocytes were collected from WT mice that were either naïve or colonized  
111 with *C. difficile* strain 630 for three weeks (figure S1A). Development of humoral immune  
112 responses to *C. difficile* in the donor mice was confirmed by the detection of high titers of anti-  
113 TcdA IgG in the serum while uninfected mice had undetectable levels of anti-TcdA serum IgG  
114 ( $p<0.01$ ) (figure S1B).

115 Recipient RAG1<sup>-/-</sup> mice were infected with *C. difficile* strain 630 prior to the adoptive  
116 transfer. Donor splenocytes were administered to the recipient RAG1<sup>-/-</sup> mice two days after *C.*  
117 *difficile* challenge, when *C. difficile* colonization had already reached high levels. Recipient mice  
118 were randomly assigned to one of three groups and either received splenocytes from naïve WT  
119 donors, infected WT donors, or vehicle.

120 To confirm engraftment of the WT cells, we measured total serum IgG in the recipient  
121 mice three-weeks post transfer. The mice that received splenocytes had significantly higher  
122 levels of total serum IgG post-transfer compared to the mice that received vehicle ( $p<0.05$ )  
123 (figure 2A). Of the mice that received splenocytes, two did not develop any detectable serum  
124 IgG. There was no difference in the levels of total serum IgG between the mice that received  
125 splenocytes from infected donors versus uninfected donors ( $p>0.05$ ). Furthermore, we  
126 determined that we successfully transferred anti-*C. difficile* immunity as we detected anti-TcdA

127 IgG only in the serum from the mice that received splenocytes from the infected donors ( $p < 0.01$ )  
128 (figure 2B).

129       Following adoptive transfer, levels of *C. difficile* in the feces were monitored for three  
130 weeks. We observed clearance of *C. difficile* from one cage of mice in the group that received  
131 splenocytes from infected donors. However, clearance of *C. difficile* did not occur in any of the  
132 other animals within that treatment group (figure 2C). Three-weeks post transfer there was no  
133 significant difference in levels of colonization in any of the treatment groups (figure 2D).  
134 Notably, in the cage that cleared, one mouse had undetectable levels of serum IgG while the  
135 other three mice in the cage had detectable levels (figure 2A, filled pink circles). Together these  
136 results suggest that reconstitution of adaptive immunity is not sufficient for clearance of *C.*  
137 *difficile*.

138       The range in the levels of colonization we observed within each treatment group  
139 suggested adaptive immunity is not sufficient to explain the differences in clearance of *C.*  
140 *difficile*. Visualization of the Bray-Curtis dissimilarity between the day one post infection  
141 communities (before the adoptive transfer) using multidimensional scaling revealed that the mice  
142 that went on to clear *C. difficile* had a distinct community compared to the mice that would  
143 remain colonized, ANOSIM  $p = 0.02$  (figure 3). This result suggests the structure of gut  
144 microbiota rather than adoptive transfer of splenocytes is associated with clearance of *C.*  
145 *difficile*.

#### 146 **Specific members of the microbiota are altered in mice with reconstituted adaptive** 147 **immunity**

148       The microbiota and the immune system have been previously shown to modulate one  
149 another through numerous complex interactions (18, 19). In the cefoperazone mouse model of

150 infection, the diversity of microbiota begins to recover by two weeks following cessation of the  
151 antibiotic (20). Therefore, we asked if reconstitution of adaptive immunity altered the recovery  
152 of the community following antibiotics and infection with *C. difficile*. We examined the gut  
153 microbial community structure of the mice over the course of the experiment using 16S rRNA  
154 gene amplicon sequencing. Our first approach sought to determine if we could detect changes in  
155 the overall microbial community composition of the mice. We calculated the Bray-Curtis  
156 dissimilarity between each mouse's day twenty-one sample (nineteen days after the adoptive  
157 transfer) and their pre-antibiotic sample. We hypothesized that reconstitution of adaptive  
158 immunity might prevent the microbiota from returning to the same structure as was observed  
159 before adoptive transfer. Thus, we thought that perhaps the mice that received splenocytes might  
160 have higher Bray-Curtis dissimilarity values compared to the group that received only vehicle.  
161 Since we were unable to confirm that we successfully restored adaptive immune function in two  
162 of mice that received splenocytes (figure 2A), we excluded them from the rest of analysis as our  
163 questions hinged on immune status-gut microbiota interactions. Additionally, we lost the ability  
164 to calculate this metric for a couple of mice due to the lack of pre-antibiotic samples. Comparing  
165 the Bray-Curtis dissimilarity results between the three treatment groups revealed no significant  
166 differences between any of the groups (figure 4A). We also wondered if addition of adaptive  
167 immunity might alter alpha-diversity so we calculated the inverse Simpson index each fecal  
168 community at day nineteen post transfer (day twenty-one post infection). We did not observe any  
169 significant differences between the treatment groups by this metric either (figure 4B). This  
170 suggested that by broad evaluations of community structure, the perturbation of antibiotics and  
171 infection with *C. difficile* potentially has a much greater effect on the microbial community than  
172 any effects due to immune reconstitution.

173           While we saw no significant differences in the recovery of the community structure or  
174 alpha diversity at day twenty-one post infection, we wondered if perhaps the abundance of only a  
175 few operational taxonomic units (OTUs) were altered by reconstitution of the adaptive immune  
176 system. For this analysis, we grouped all of the mice that received splenocytes and developed  
177 detectable levels of serum IgG at day twenty-six post infection together and called them IgG  
178 positive. The mice that only received vehicle and thus had undetectable levels of serum IgG were  
179 designated the IgG negative group. Using OTU abundance from day twenty-one post infection  
180 samples, linear discriminant analysis effect size (LefSe) identified twenty-seven OTUs with  
181 linear discriminant analysis (LDA) values greater than two. The ten OTUs with the highest LDA  
182 values were primarily enriched in the IgG negative mice (figure 4C). OTU 3, which is classified  
183 as *Akkermansia*, had the highest LDA value. This OTU was found at a significantly lower  
184 abundance in the IgG positive mice compared to the IgG negative mice. A decrease in  
185 *Akkermansia* following reconstitution of adaptive immunity via transfer of bone marrow of from  
186 wild-type mice into RAG1<sup>-/-</sup> mice has been reported by another group (21). While the decrease  
187 in OTU 3 in the IgG positive mice was observed across the cages, many of the other OTUs that  
188 discriminated between the IgG positive and negative mice were only detected in one of the IgG  
189 negative cages.

190 **Random Forest feature selection identifies OTUs in the pre-antibiotic community that**  
191 **differentiates mice that will remain persistently colonized vs. clear.**

192 Following our previous analyses, we made the consistent observation that structure of the gut  
193 microbiome was associated with clearance of *C. difficile*, even prior to antibiotic treatment  
194 (figure 1C). We questioned if specific OTUs present in the mice before any intervention may  
195 have differentiated mice that would go on to clear the infection. For this analysis, we pooled data



196 from three independent experiments (the two described earlier and a third experiment including  
197 only WT mice) where cages of mice had spontaneously cleared *C. difficile* (figure S2). We  
198 utilized Random Forest for feature selection to identify OTUs that could classify mice as  
199 “cleared” or “colonized” based on their pre-intervention microbiota. Using the entire pre-  
200 treatment community, we could classify the mice as “cleared” or “colonized” with 76.9%  
201 accuracy. However, this model was better at classifying mice that would remain colonized and  
202 was poor at classifying mice that would go onto clear *C. difficile*, with an accuracy of only 25%.  
203 Nine out of the top ten OTUs that most contributed to classification were from the Firmicutes  
204 phylum (figure S3A and B). Two OTUs in particular (OTUs 52 and 93) ranked highest in their  
205 ability to discriminate between the groups and were significantly increased in abundance in mice  
206 that would go on to clear. Therefore, we tested if those two OTUs alone were sufficient to  
207 classify the mice. Generating a new Random Forest model using only those two OTUs, we found  
208 that the overall model improved to 82.9% accuracy in classification. Furthermore, these two  
209 OTUs could correctly classify mice that would go on to clear *C. difficile* with 66.6% accuracy  
210 (Figure 5).

## 211 **Discussion.**

212 In this study we asked if adaptive immunity was required for clearance of the  
213 gastrointestinal pathogen *C. difficile*. Results from multiple experimental models lead us to  
214 conclude that clearance of *C. difficile* in mice can occur without contributions from adaptive  
215 immune responses. This finding is in contrast to the paradigm observed in other gastrointestinal  
216 infections. For example, infection with the attaching-effacing pathogen *Citrobacter rodentium*,  
217 provides a framework by which the adaptive immunity facilitates clearance (22, 23). In addition  
218 to the potential direct effects, adaptive immunity may have on the bacterium itself, it is known

219 that there is a complex interaction loop between the microbiota and host immune response. Both  
220 the innate and adaptive arms of the immune system regulate membership of the gut microbial  
221 community while the gut microbiota in turn modulates the immune system via the production of  
222 metabolites and/or MAMPs (24).

223 Our results show that reconstitution of adaptive immunity is associated with altered  
224 abundance of some bacteria in the gut, however it does not impact levels of *C. difficile*  
225 colonization. We found that in the reconstituted RAG1<sup>-/-</sup> mice that developed serum IgG, there  
226 was a decreased abundance of *Akkermansia* (OTU 3). Another group has previously observed  
227 this result; however, we were surprised to see the same trend in our model as our mice were also  
228 subjected to antibiotic therapy and infection with *C. difficile*. In the two mice that received  
229 splenocytes but did not have detectable serum IgG, the abundance of the *Akkermansia* OTU was  
230 very low (figure S4A). There are numerous reasons why this could be the case, the first being  
231 that a lack of serum IgG does not preclude successful transfer of T cells which may be  
232 responsible for modulating levels of *Akkermansia* in wild-type mice. Additionally, fecal IgG or  
233 IgA from the mice that had successful transfers may have been transmitted via coprophagy in  
234 sufficient quantities to modulate the levels of *Akkermansia* in the IgG negative mice that were  
235 sharing their cage. Since the relative abundance of OTU3 was not significantly different between  
236 the groups in the pre-treatment samples we can conclude that the differences we observed were a  
237 result of the experimental conditions not merely baseline differences in their microbiota (figure  
238 S4B). *Akkermansia* has been implicated in the modulation of health processes such as regulation  
239 of host metabolism so further studies are necessary to fully elucidate the factors that regulate its  
240 abundance in the gut (25, 26).

241           Based on our repeated observations that altered communities early in the experimental  
242 timeline was associated with clearance of *C. difficile* we used Random Forest to eventually  
243 identify just two OTUs that could classify mice that would go on to clear *C. difficile* with 66.6%  
244 accuracy. Previous work using a similar approach identified OTUs present on the day of  
245 challenge that were predictive of levels of colonization day one post-infection, however we are  
246 the first group to assess if the composition of the murine gut microbiota before any treatment  
247 might affect the outcome of *C. difficile* infection (27). Both of the OTUs we identified belong to  
248 the family *Lachnospiraceae* and were enriched in mice that would go on to clear *C. difficile*  
249 infection. Our group has previously observed that high levels of *Lachnospiraceae* is associated  
250 with protection from severe disease in a murine model of CDI (28). One possibility is that these  
251 bacteria are just inherently resistant to cefoperazone, however in vitro antibiotic susceptibility  
252 testing of *Lachnospiraceae* isolates from our mouse colony suggest that this is not the case (data  
253 not shown). Furthermore, we have also reported that mono-association of germ-free mice with a  
254 single *Lachnospiraceae* isolate partially restored colonization resistance (29). It is tempting to  
255 speculate multiple *Lachnospiraceae* isolates might be able to fully restore colonization  
256 resistance. However, it remains to be seen if the same mechanisms, which prevent initial  
257 colonization of *C. difficile*, play a role in clearance of *C. difficile*.

258           Our results suggest that community resilience is intrinsic to the community membership  
259 at baseline, prior to any antibiotic treatment. Additionally, these data suggest the possibility of  
260 predicting individuals that will be at risk for persistent colonization before antibiotic therapy.  
261 However, a crucial first step is to determine if predictive OTUs are different across perturbations  
262 such as various classes of antibiotic therapy. Finally, our findings have implications for the  
263 design of future preclinical studies testing the efficacy of vaccines or other manipulations of

264 adaptive immunity on levels of colonization as “cage effects” or inherent differences in the  
265 baseline community structure of animals within cages may bias findings. Experimental  
266 approaches that can be implemented to account for the role of the microbiota include co-housing,  
267 using multiple cages for each experimental condition, and the use of littermate controls (30).

268

## 269 **Material and Methods.**

270 **Animal Husbandry.** Both male and female C57BL/6 specific-pathogen-free (SPF) mice age five  
271 to twelve weeks were used in these studies. The wild-type (WT) mice were from a breeding  
272 colony at the University of Michigan, originally derived from Jackson Laboratories over a  
273 decade ago. The RAG1<sup>-/-</sup> (B6.129S7-*Rag1*<sup>tm1Mom</sup>/J) mice were from a breeding colony started  
274 with mice from Jackson Laboratories in 2013. Animals were housed in filter top cages with  
275 corncob bedding and nestlet enrichment. Water bottles were autoclaved empty and filled in a  
276 biological safety cabinet with either sterile water or antibiotic dissolved in sterile water. Mice  
277 were fed a standard irradiated chow (LabDiet 5L0D) and had access to food and water *ad*  
278 *libitum*. Cage changes were carried out in a biological safety cabinet. The frequency of cage  
279 changes varied depending on the experiment. To prevent cross-contamination between cages,  
280 hydrogen peroxide-based disinfectants in addition to frequent glove changes were utilized during  
281 all manipulation of the animals. The mice were maintained under 12-hours of light/dark cycles in  
282 facilities maintained at a temperature of 72°C +/- 4 degrees. Animal sample size was not  
283 determined by a statistical method. Multiple cages of animals for each treatment were used to  
284 control for possible differences in the microbiota between cages. Mice were evaluated daily for  
285 signs of disease. Euthanasia was carried out via CO<sub>2</sub> asphyxiation when mice were determined to  
286 be moribund or at the conclusion of the experiment. Animal studies were conducted under the

287 approval of The University of Michigan Committee on the Care and Use of Animals; husbandry  
288 was performed in an AAALAC-accredited facility.

289 **Spore Preparation.** Spore stocks of *C. difficile* strain 630 (ATCC BAA-1382) were prepared as  
290 previously described with the following modifications; strains were grown overnight in 5mL of  
291 Difco Columbia broth (BD Biosciences 294420), which was added to 40mL of Clospore media  
292 (3, 31).

293 **Infections.** In experiments comparing colonization in WT and RAG1<sup>-/-</sup> mice, age and sex  
294 matched mice were co-housed for thirty-three days starting at three weeks of age and continuing  
295 through cefoperazone administration. Upon infection, animals were separated into single  
296 genotype housing. Mice were made susceptible to infection by providing *ad libitum* drinking  
297 water with the addition of 0.5mg/mL cefoperazone (MP Pharmaceuticals 0219969501) in Gibco  
298 distilled water (15230147). The antibiotic water was changed every two days and was provided  
299 for ten days. Following two days of supplying drinking water without antibiotic, mice were  
300 challenged with either spores or water (mock). *C. difficile* spores suspended in 50μL of Gibco  
301 distilled water were administered via oral gavage. The number of viable spores in each inoculum  
302 was innumerate by plating for colony-forming units (CFU) per mL<sup>-1</sup> on pre-reduced taurocholate  
303 cycloserine cefoxitin fructose agar (TCCFA). TCCFA was made as originally described (32) with  
304 the following modifications: the agar base consisted of 40g of Proteose Peptone No. 3 (BD  
305 Biosciences 211693), 5g of Na<sub>2</sub>HPO<sub>4</sub> (Sigma-Aldrich S5136), 1g of KH<sub>2</sub>PO<sub>4</sub> (Fisher P285500),  
306 2g NaCl (J.T. Baker 3624-05), 0.1g MgSO<sub>4</sub> (Sigma M7506), 6g Fructose (Fisher L95500), and  
307 20g of agar (Life Technologies 30391-023) dissolved in 800mL of Milli-Q water. Following  
308 adjustment of volume to 1L, the media was autoclaved and supplemented with D-cycloserine to  
309 a final concentration of 250μg/mL of (Sigma-Aldrich C6880), cefoxitin to a final concentration

310 16µg/mL (Sigma-Aldrich C4786) and taurocholate to a final concentration 0.1% (Sigma T4009).

311 Over the course of the infection, mice were routinely weighed and stool was collected for

312 quantitative culture. Mice were challenged with between  $10^2$  and  $10^4$  CFU.

313 **Quantitative Culture.** Fresh voided fecal pellets were collected from each mouse into a pre-

314 weighted sterile tube. Following collection, the tubes were reweighed and passed into an

315 anaerobic chamber (Coy Laboratories). In the chamber, each sample was diluted 1 to 10 (w/v)

316 using pre-reduced sterile PBS and serially diluted. 100µL of a given dilution was spread onto

317 pre-reduced TCCFA or when appropriate TCCFA supplemented with final concentration of

318 either 2 or 6µg/mL of erythromycin (Sigma E0774). Strain 630 is erythromycin resistant; use of

319 erythromycin in TCCFA plates reduced background growth from other bacteria in the sample.

320 Plates were incubated anaerobically at 37°C and colonies were enumerated at 18-24 hours. Plates

321 that were used to determine if mice were negative for *C. difficile* were held and rechecked at 48

322 hours.

323 **Splenocytes Recovery and Transfer.** Spleens from individual animals were aseptically

324 harvested from donor mice. Following harvest, the organ was gently homogenized using sterile

325 glass slides to remove the cells from the capsule. Cells were suspended in filter-sterilized RPMI

326 complete media consisting of RPMI + 1 L-glutamine (Gibco 11875-093) supplemented with

327 10% FBS (Gibco 16140-071), 1% 100x Penicillin-Streptomycin (Gibco 15070-063), 1% 1M

328 HEPES (Gibco 15630-080), 1% 100x non-essential amino acids (Gibco 11140-050), 1% 100mM

329 Sodium Pyruvate (Gibco 11360-070) and 0.05mL of 1M 2-Mercaptoethanol (Sigma M3148). To

330 remove large debris, the cell suspension was filtered through a 40µm cell strainer. Cells were

331 pelleted by centrifugation at 1,500 rpm for 5 minutes at 4°C. Following the spin, the pellet was

332 suspended in red blood cell lysing buffer (Sigma R7757) and incubated with the solution for no

333 more than 5 minutes. Lysis was stopped with the addition of RPMI complete media and cells  
334 were enumerated manually using a haemocytometer. Following enumeration, the cells were  
335 pelleted again by centrifugation at 1,500 rpm for 5 minutes at 4°C and re-suspended in  
336 Leibovitz's L-15 (Corning 10-045-CV) media. Recipient mice were injected into the peritoneal  
337 cavity with  $2 \times 10^7$  cells in 0.25mL L-15 media. Mice that received vehicle were injected with  
338 0.25mL of L-15 media only.

339 **Blood Collection.** Blood was collected from either the saphenous vein for pre-treatment time  
340 points or via heart puncture at the experimental endpoint. Collections from the saphenous vein  
341 utilized capillary tubes (Sarstedt microvette CB300 Z) while blood collected via heart puncture  
342 utilized a polymer gel-based separator tube (BD Microtainer SST). Following collection, tubes  
343 were spun according to manufacturer's instructions, serum was aliquoted and stored at -80°C  
344 until use.

345 **Total IgG ELISA.** Total serum IgG levels were measured using the IgG (Total) Mouse  
346 Uncoated ELISA Kit (ThermoFisher Scientific 88-50400). Each sample was diluted 500-fold in  
347 assay buffer and run in duplicate with Southern Biotech TMB Stop Solution (0412-01) used as  
348 the stop solution. Optical density values were measured at 450nm and 570nm on a VersaMax  
349 plate reader (Molecular Devices, Sunnyvale, CA) and corrected by subtracting the 570nm  
350 measurement from the 450nm measurement. A 4-Parameter Standard Curve was used to  
351 calculate sample concentration values.

352 **Anti-*C. difficile* TcdA IgG ELISA.** Titers of serum IgG specific to *C. difficile* TcdA (toxin A)  
353 was measured by ELISA as previously described, with the following modifications (33). Serum  
354 from RAG1<sup>-/-</sup> mice that received an adoptive transfer was diluted 1:50 in blocking buffer with  
355 subsequent serial dilutions to a final dilution of 1:12,150. Serum from the wild-type mice was

356 diluted 1:1,200 in blocking buffer with subsequent serial dilutions to a final dilution of  
357 1:874,800. Each sample was run in duplicate. Each plate had the following negative controls: all  
358 reagents except serum, all reagents except toxin and pre-immune serum if applicable.  
359 Additionally, each plate had a positive control consisting of toxin coated wells reacted with  
360 mouse TcdA monoclonal antibody TGC2 diluted 1:5,000 in blocking buffer (antibodies-  
361 online.com ABIN335169). The optical density at 410nm and 650nm was recorded on a  
362 VersaMax plate reader (Molecular Devices, Sunnyvale CA). The absorbance for each sample  
363 was corrected by subtracting the OD<sub>650</sub> reading from the OD<sub>410</sub> reading. The anti-TcdA IgG titer  
364 for each sample was defined as the last dilution with a corrected OD<sub>410</sub> greater than average  
365 corrected OD<sub>410</sub> of the negative control wells plus three times the standard deviation of those  
366 wells.

367 **DNA Extraction.** Genomic DNA was extracted from approximately 200-300µl of fecal sample  
368 using the MoBio PowerSoil HTP 96 DNA isolation kit (formerly MoBio, now Qiagen) on the  
369 Eppendorf EpMotion 5075 automated pipetting system according to manufacturer's instructions.

370 **Sequencing.** The University of Michigan Microbial Systems Laboratory constructed amplicon  
371 libraries from extracted DNA as described previously (34). Briefly, the V4 region of the 16S  
372 rRNA gene was amplified using barcoded dual index primers as described by Kozich et al. (35).  
373 The PCR reaction included the following: 5µl of 4µM stock combined primer set, 0.15µl of  
374 Accuprime high-fidelity Taq with 2µl of 10× Accuprime PCR II buffer (Life Technologies,  
375 12346094), 11.85µl of PCR-grade water, and 1µl of template. The PCR cycling conditions were  
376 as follows: 95°C for 2 minutes, 30 cycles of 95°C for 20 seconds, 55°C for 15 seconds, and 72°C  
377 for 5 minutes, and 10 minutes at 72°C. Following construction, libraries were normalized and  
378 pooled using the SequelPrep normalization kit (Life Technologies, A10510-01). The



379 concentration of the pooled libraries was determined using the Kapa Biosystems library  
380 quantification kit (KapaBiosystems, KK4854) while amplicon size was determined using the  
381 Agilent Bioanalyzer high-sensitivity DNA analysis kit (5067-4626). Amplicon libraries were  
382 sequenced on the Illumina MiSeq platform using the MiSeq Reagent 222 kit V2 (MS-102-2003)  
383 (500 total cycles) with modifications for the primer set. Illumina's protocol for library  
384 preparation was used for 2nM libraries, with a final loading concentration of 4pM spiked with  
385 10% genomic PhiX DNA for diversity. The raw paired-end reads of the sequences for all  
386 samples used in this study can be accessed in the Sequence Read Archive under PRJNA388335.  
387 **Sequence Curation and Analysis.** Raw sequences were curated using the mothur v.1.39.0  
388 software package (36) following the Illumina MiSeq standard operating procedure. Briefly,  
389 paired end reads were assembled into contigs and aligned to the V4 region using the SLIVA 16S  
390 rRNA sequence database (release v128) (37), any sequences that failed to align were removed;  
391 sequences that were flagged as possible chimeras by UCHIME were also removed (38).  
392 Sequences were classified with a naïve Bayesian classifier (39) using the Ribosomal Database  
393 Project (RDP) and clustered in to Operational Taxonomic Units (OTUs) using a 97% similarity  
394 cutoff with the Opticlust clustering algorithm (40).

395         The number of sequences in each sample was then rarefied to 10,000 sequences to  
396 minimize bias due to uneven sampling. For feature selection, the shared file was filtered to  
397 remove any OTU that was in less than six samples across the entire data set. The mothur  
398 implementation of LefSe (linear discriminant analysis effect size) was used to determine OTUs  
399 that differentiated IgG positive versus RAG1<sup>-/-</sup> mice given vehicle nineteen days post adoptive  
400 transfer (41). Following curation in mothur, further data analysis and figure generation was  
401 carried out in R (v 3.3.3) using standard and loadable packages (42). The data and code for all

402 analysis associated with this study are available at  
403 [https://github.com/jlleslie/AdaptiveImmunity\\_and\\_Clearance](https://github.com/jlleslie/AdaptiveImmunity_and_Clearance).

404 Most of the analysis relied on the R package *vegan* (43). This includes, determining the  
405 axes for the multidimensional scaling (MDS) plots using Bray-Curtis dissimilarity calculated  
406 from sequence abundance. Additionally, *vegan* was used to determine significance between  
407 groups using ANOSIM, calculation of Inverse Simpson index, and Bray-Curtis dissimilarity  
408 between samples. Final figures were modified and arranged in Adobe Illustrator CC. For the  
409 purpose of distinguishing between values that were detected at the limit of detection versus those  
410 that were undetected, all results that were not detected by a given assay were plotted at an  
411 arbitrary point below the LOD. However, for statistical analysis, the value of  $\text{LOD}/\sqrt{2}$  was  
412 substituted for undetected values. Wilcoxon ranked sum test was used to determine significant  
413 differences and when appropriate, reported *p*-values were corrected for multiple comparisons  
414 using the Benjamini–Hochberg correction.

415 **Random Forest Analysis.** Random Forest analysis was performed using R (v.3.2.3) using the  
416 *randomForest* package (44, 45). Model parameters *ntree* and *mtry* were tuned based on the input  
417 datasets in order to achieve optimal classification without over-fitting (46). Briefly, *ntree* was  
418 calculated by multiplying the total number of OTUs included in the analysis by a ratio of the  
419 quantity of samples in each classification category. Additionally, *mtry* was defined as the square  
420 root of the number of OTUs. The informative cutoff for Mean Decease Accuracy (MDA) values  
421 was determined by the absolute value of the lowest MDA measured (47). Testing for significant  
422 difference in OTU relative abundance following feature selection was performed using Wilcoxon  
423 signed-rank test with Benjamini–Hochberg correction.

424  
425 **Acknowledgements.**

426

427           This work was funded by NIH 5T32AI007528 (J.L.L.), the Rackham Predoctoral  
428 Fellowship (J.L.L.), UM EDGE Student Fellowship (J.L.L.), and U01AI124255 (V.B.Y.). The  
429 funders had no role in study design, data collection or interpretation. The authors report no  
430 financial conflict of interest.

431           The authors would like acknowledging Judith Opp, April Cockburn and Harriet  
432 Carrington of the University of Michigan Microbial Systems Laboratory for constructing and  
433 sequencing the amplicon libraries. We would also like to thank Dr. Mary Riwes for providing  
434 protocols for splenocyte harvest and preparation. Finally, we would also like to thank Katherine  
435 Wozniak for helping to start and maintain the RAG1 knockout colony.

436

#### 437 **Author Contributions.**

438           JLL and VBY conceived the study. JLL, KCV, and MLJ performed experiments and  
439 analyzed the data. All authors contributed to writing the manuscript and had access to all of the  
440 data.

441

#### 442 **References.**

443

444

- 445 1. Lessa FC, Mu Y, Bamberg WM, Beldavs ZG, Dumyati GK, Dunn JR, Farley MM,  
446 Holzbauer SM, Meek JI, Phipps EC, Wilson LE, Winston LG, Cohen JA, Limbago  
447 BM, Fridkin SK, Gerding DN, McDonald LC. 2015. Burden of *Clostridium difficile*  
448 infection in the United States. *New England Journal of Medicine* 372:825-834.
- 449 2. Chalmers JD, Akram AR, Singanayagam A, Wilcox MH, Hill AT. 2016. Risk factors for  
450 *Clostridium difficile* infection in hospitalized patients with community-acquired  
451 pneumonia. *J Infect* 73:45-53.
- 452 3. Theriot CM, Koenigsnecht MJ, Carlson PE, Hatton GE, Nelson AM, Li B, Huffnagle  
453 GB, Li J, Young VB. 2014. Antibiotic-induced shifts in the mouse gut microbiome and  
454 metabolome increase susceptibility to *Clostridium difficile* infection. *Nature*  
455 *communications* 5:3114-3114.

- 456 4. Carter GP, Rood JI, Lyras D. 2010. The role of toxin A and toxin B in *Clostridium*  
457 *difficile*-associated disease. *Gut Microbes* 1:58-64.
- 458 5. Pruitt RN, Chumbler NM, Rutherford SA, Farrow MA, Friedman DB, Spiller B, Lacy  
459 DB. 2012. Structural determinants of *Clostridium difficile* toxin A glucosyltransferase  
460 activity. *Journal of Biological Chemistry* 287:8013-8020.
- 461 6. Leslie JL, Huang S, Opp JS, Nagy MS, Kobayashi M, Young VB, Spence JR. 2015.  
462 Persistence and toxin production by *Clostridium difficile* within human intestinal  
463 organoids result in disruption of epithelial paracellular barrier function. *Infection and*  
464 *Immunity* 83:138-145.
- 465 7. Tam J, Beilhartz Greg L, Auger A, Gupta P, Therien Alex G, Melnyk Roman A. 2015.  
466 Small molecule inhibitors of *Clostridium difficile* toxin B-induced cellular damage.  
467 *Chemistry & Biology* 22:175-185.
- 468 8. Jiang ZD, Ajami NJ, Petrosino JF, Jun G, Hanis CL, Shah M, Hochman L, Ankoma-Sey  
469 V, DuPont AW, Wong MC, Alexander A, Ke S, DuPont HL. 2017. Randomised clinical  
470 trial: faecal microbiota transplantation for recurrent *Clostridium difficile* infection - fresh,  
471 or frozen, or lyophilised microbiota from a small pool of healthy donors delivered by  
472 colonoscopy. *Aliment Pharmacol Ther* 45:899-908.
- 473 9. Brandt LJ, Aroniadis OC, Mellow M, Kanatzar A, Kelly C, Park T, Stollman N, Rohlke  
474 F, Surawicz C. 2012. Long-Term Follow-Up of Colonoscopic Fecal Microbiota  
475 Transplant for Recurrent *Clostridium difficile* Infection. *Am J Gastroenterol* 107:1079-  
476 1087.
- 477 10. Dowle C. 2016. Faecal microbiota transplantation: a review of FMT as an alternative  
478 treatment for *Clostridium difficile* infection. *Bioscience Horizons: The International*  
479 *Journal of Student Research* 9:hzw007-hzw007.
- 480 11. Kyne L, Warny M, Qamar A, Kelly C. 2001. Association between antibody response to  
481 toxin A and protection against recurrent *Clostridium difficile* diarrhoea. *Lancet* 357:189-  
482 193.
- 483 12. Wilcox MH, Gerding DN, Poxton IR, Kelly C, Nathan R, Birch T, Cornely OA, Rahav  
484 G, Bouza E, Lee C, Jenkin G, Jensen W, Kim Y-S, Yoshida J, Gabryelski L, Pedley A,  
485 Eves K, Tipping R, Guris D, Kartsonis N, Dorr M-B. 2017. Bezlotoxumab for prevention  
486 of recurrent *Clostridium difficile* infection. *New England Journal of Medicine* 376:305-  
487 317.
- 488 13. Giannasca PJ, Zhang ZX, Lei WD, Boden JA, Giel MA, Monath TP, Thomas WD. 1999.  
489 Serum antitoxin antibodies mediate systemic and mucosal protection from *Clostridium*  
490 *difficile* disease in hamsters. *Infection and immunity* 67:527-538.
- 491 14. Johnston PF, Gerding DN, Knight KL. 2014. Protection from *Clostridium difficile*  
492 infection in CD4 T cell- and polymeric immunoglobulin receptor-deficient mice.  
493 *Infection and Immunity* 82:522-531.
- 494 15. Bruxelle JF, Mizrahi A, Hoys S, Collignon A, Janoir C, Péchiné S. 2016. Immunogenic  
495 properties of the surface layer precursor of *Clostridium difficile* and vaccination assays in  
496 animal models. *Anaerobe* 37:78-84.
- 497 16. Ghose C, Eugenis I, Sun X, Edwards AN, McBride SM, Pride DT, Kelly CP, Ho DD.  
498 2016. Immunogenicity and protective efficacy of recombinant *Clostridium difficile*  
499 flagellar protein FliC. *Emerging Microbes & Infections* 5:e8.
- 500 17. Lawley TD, Clare S, Walker AW, Stares MD, Connor TR, Raisen C, Goulding D, Rad R,  
501 Schreiber F, Brandt C, Deakin LJ, Pickard DJ, Duncan SH, Flint HJ, Clark TG, Parkhill

- 502 J, Dougan G. 2012. Targeted restoration of the intestinal microbiota with a simple,  
503 defined bacteriotherapy resolves relapsing *Clostridium difficile* disease in mice. PLoS  
504 Pathog 8:e1002995.
- 505 18. Round JL, Mazmanian SK. 2009. The gut microbiome shapes intestinal immune  
506 responses during health and disease. Nature reviews Immunology 9:313-323.
- 507 19. Rooks MG, Garrett WS. 2016. Gut microbiota, metabolites and host immunity. Nat Rev  
508 Immunol 16:341-352.
- 509 20. Theriot CM, Bowman AA, Young VB. 2016. Antibiotic-induced alterations of the gut  
510 microbiota alter secondary bile acid production and allow for *Clostridium difficile* spore  
511 germination and outgrowth in the large intestine. mSphere 1.
- 512 21. Zhang H, Sparks JB, Karyala SV, Settlage R, Luo XM. 2015. Host adaptive immunity  
513 alters gut microbiota. ISME J 9:770-781.
- 514 22. Kamada N, Sakamoto K, Seo SU, Zeng MY, Kim YG, Cascalho M, Vallance BA, Puente  
515 JL, Nunez G. 2015. Humoral Immunity in the Gut Selectively Targets Phenotypically  
516 Virulent Attaching-and-Effacing Bacteria for Intraluminal Elimination. Cell Host  
517 Microbe 17:617-27.
- 518 23. Kamada N, Kim Y-G, Sham H, Vallance B, Puente J, Martens E, Núñez G. 2012.  
519 Regulated virulence controls the ability of a pathogen to compete with the gut microbiota.  
520 Science (New York, NY) 336:1325-1329.
- 521 24. McDermott AJ, Huffnagle GB. 2014. The microbiome and regulation of mucosal  
522 immunity. Immunology 142:24-31.
- 523 25. Plovier H, Everard A, Druart C, Depommier C, Van Hul M, Geurts L, Chilloux J, Ottman  
524 N, Duparc T, Lichtenstein L, Myridakis A, Delzenne NM, Klievink J, Bhattacharjee A,  
525 van der Ark KCH, Aalvink S, Martinez LO, Dumas M-E, Maiter D, Loumaye A,  
526 Hermans MP, Thissen J-P, Belzer C, de Vos WM, Cani PD. 2017. A purified membrane  
527 protein from *Akkermansia muciniphila* or the pasteurized bacterium improves  
528 metabolism in obese and diabetic mice. Nat Med 23:107-113.
- 529 26. Everard A, Belzer C, Geurts L, Ouwerkerk JP, Druart C, Bindels LB, Guiot Y, Derrien  
530 M, Muccioli GG, Delzenne NM, de Vos WM, Cani PD. 2013. Cross-talk between  
531 *Akkermansia muciniphila* and intestinal epithelium controls diet-induced obesity. Proc  
532 Natl Acad Sci U S A 110:9066-71.
- 533 27. Schubert AM, Sinani H, Schloss PD. 2015. Antibiotic-induced alterations of the murine  
534 gut microbiota and subsequent effects on colonization resistance against *Clostridium*  
535 *difficile*. mBio 6.
- 536 28. Reeves AE, Theriot CM, Bergin IL, Huffnagle GB, Schloss PD, Young VB. 2010. The  
537 interplay between microbiome dynamics and pathogen dynamics in a murine model of  
538 *Clostridium difficile* Infection. Gut microbes 2:145-158.
- 539 29. Reeves AE, Koenigs-knecht MJ, Bergin IL, Young VB. 2012. Suppression of *Clostridium*  
540 *difficile* in the gastrointestinal tracts of germfree mice inoculated with a murine isolate  
541 from the family Lachnospiraceae. Infection and immunity 80:3786-3794.
- 542 30. Stappenbeck TS, Virgin HW. 2016. Accounting for reciprocal host–microbiome  
543 interactions in experimental science. Nature 534:191-199.
- 544 31. Perez J, Springthorpe, V. S. & Sattar, S. A. . 2011. Clospore: a liquid medium for  
545 producing high titers of semi-purified spores of *Clostridium difficile*. J AOAC Int  
546 94:618–626

- 547 32. George WL, Sutter VL, Citron D, Finegold SM. 1979. Selective and differential medium  
548 for isolation of *Clostridium difficile*. Journal of Clinical Microbiology 9:214-219.
- 549 33. Trindade BC, Theriot CM, Leslie JL, Carlson Jr PE, Bergin IL, Peters-Golden M, Young  
550 VB, Aronoff DM. 2014. *Clostridium difficile*-induced colitis in mice is independent of  
551 leukotrienes. Anaerobe 30:90-98.
- 552 34. Seekatz AM, Theriot CM, Molloy CT, Wozniak KL, Bergin IL, Young VB. 2015. Fecal  
553 Microbiota Transplantation Eliminates *Clostridium difficile* in a Murine Model of  
554 Relapsing Disease. Infect Immun 83:3838-46.
- 555 35. Kozich JJ, Westcott SL, Baxter NT, Highlander SK, Schloss PD. 2013. Development of a  
556 dual-index sequencing strategy and curation pipeline for analyzing amplicon sequence  
557 data on the MiSeq Illumina sequencing platform. Applied and Environmental  
558 Microbiology 79:5112-5120.
- 559 36. Schloss PD, Westcott SL, Ryabin T, Hall JR, Hartmann M, Hollister EB, Lesniewski RA,  
560 Oakley BB, Parks DH, Robinson CJ, Sahl JW, Stres B, Thallinger GG, Van Horn DJ,  
561 Weber CF. 2009. Introducing mothur: Open-Source, Platform-Independent, Community-  
562 Supported Software for Describing and Comparing Microbial Communities. Applied and  
563 Environmental Microbiology 75:7537-7541.
- 564 37. Quast C, Pruesse E, Yilmaz P, Gerken J, Schweer T, Yarza P, Peplies J, Glöckner FO.  
565 2013. The SILVA ribosomal RNA gene database project: improved data processing and  
566 web-based tools. Nucleic Acids Research 41:D590-D596.
- 567 38. Edgar RC, Haas BJ, Clemente JC, Quince C, Knight R. 2011. UCHIME improves  
568 sensitivity and speed of chimera detection. Bioinformatics 27:2194-2200.
- 569 39. Wang Q, Garrity GM, Tiedje JM, Cole JR. 2007. Naive Bayesian classifier for rapid  
570 assignment of rRNA sequences into the new bacterial taxonomy. Appl Environ Microbiol  
571 73:5261-7.
- 572 40. Westcott SL, Schloss PD. 2017. OptiClust, an improved method for assigning amplicon-  
573 based sequence data to operational taxonomic units. mSphere 2.
- 574 41. Segata N, Izard J, Waldron L, Gevers D, Miropolsky L, Garrett WS, Huttenhower C.  
575 2011. Metagenomic biomarker discovery and explanation. Genome Biology 12:R60.
- 576 42. R Core Team. 2017. R: A Language and Environment for Statistical Computing, R  
577 Foundation for Statistical Computing, Vienna, Austria. <http://www.R-project.org/>
- 578 43. Jari Oksanen FGB, Michael Friendly, Roeland Kindt, Pierre Legendre, Dan McGlenn,  
579 Peter R. Minchin, R. B. O'Hara, Gavin L. Simpson, Peter Solymos, M. Henry H. Stevens,  
580 Eduard Szoecs and Helene Wagner. 2017. vegan: Community Ecology Package., vR  
581 package version 2.4-3. CRAN. <https://CRAN.R-project.org/package=vegan>.
- 582 44. Breiman L. 2001. Random Forests. Machine Learning 45:5-32.
- 583 45. Liaw A, Wiener M. 2002. Classification and regression by randomForest. R news 2:18-  
584 22.
- 585 46. Huang BFF, Boutros PC. 2016. The parameter sensitivity of random forests. BMC  
586 Bioinformatics 17:331.
- 587 47. Strobl C, Malley J, Tutz G. 2009. An introduction to recursive partitioning: rationale,  
588 application and characteristics of classification and regression trees, bagging and random  
589 forests. Psychological methods 14:323-348.
- 590  
591

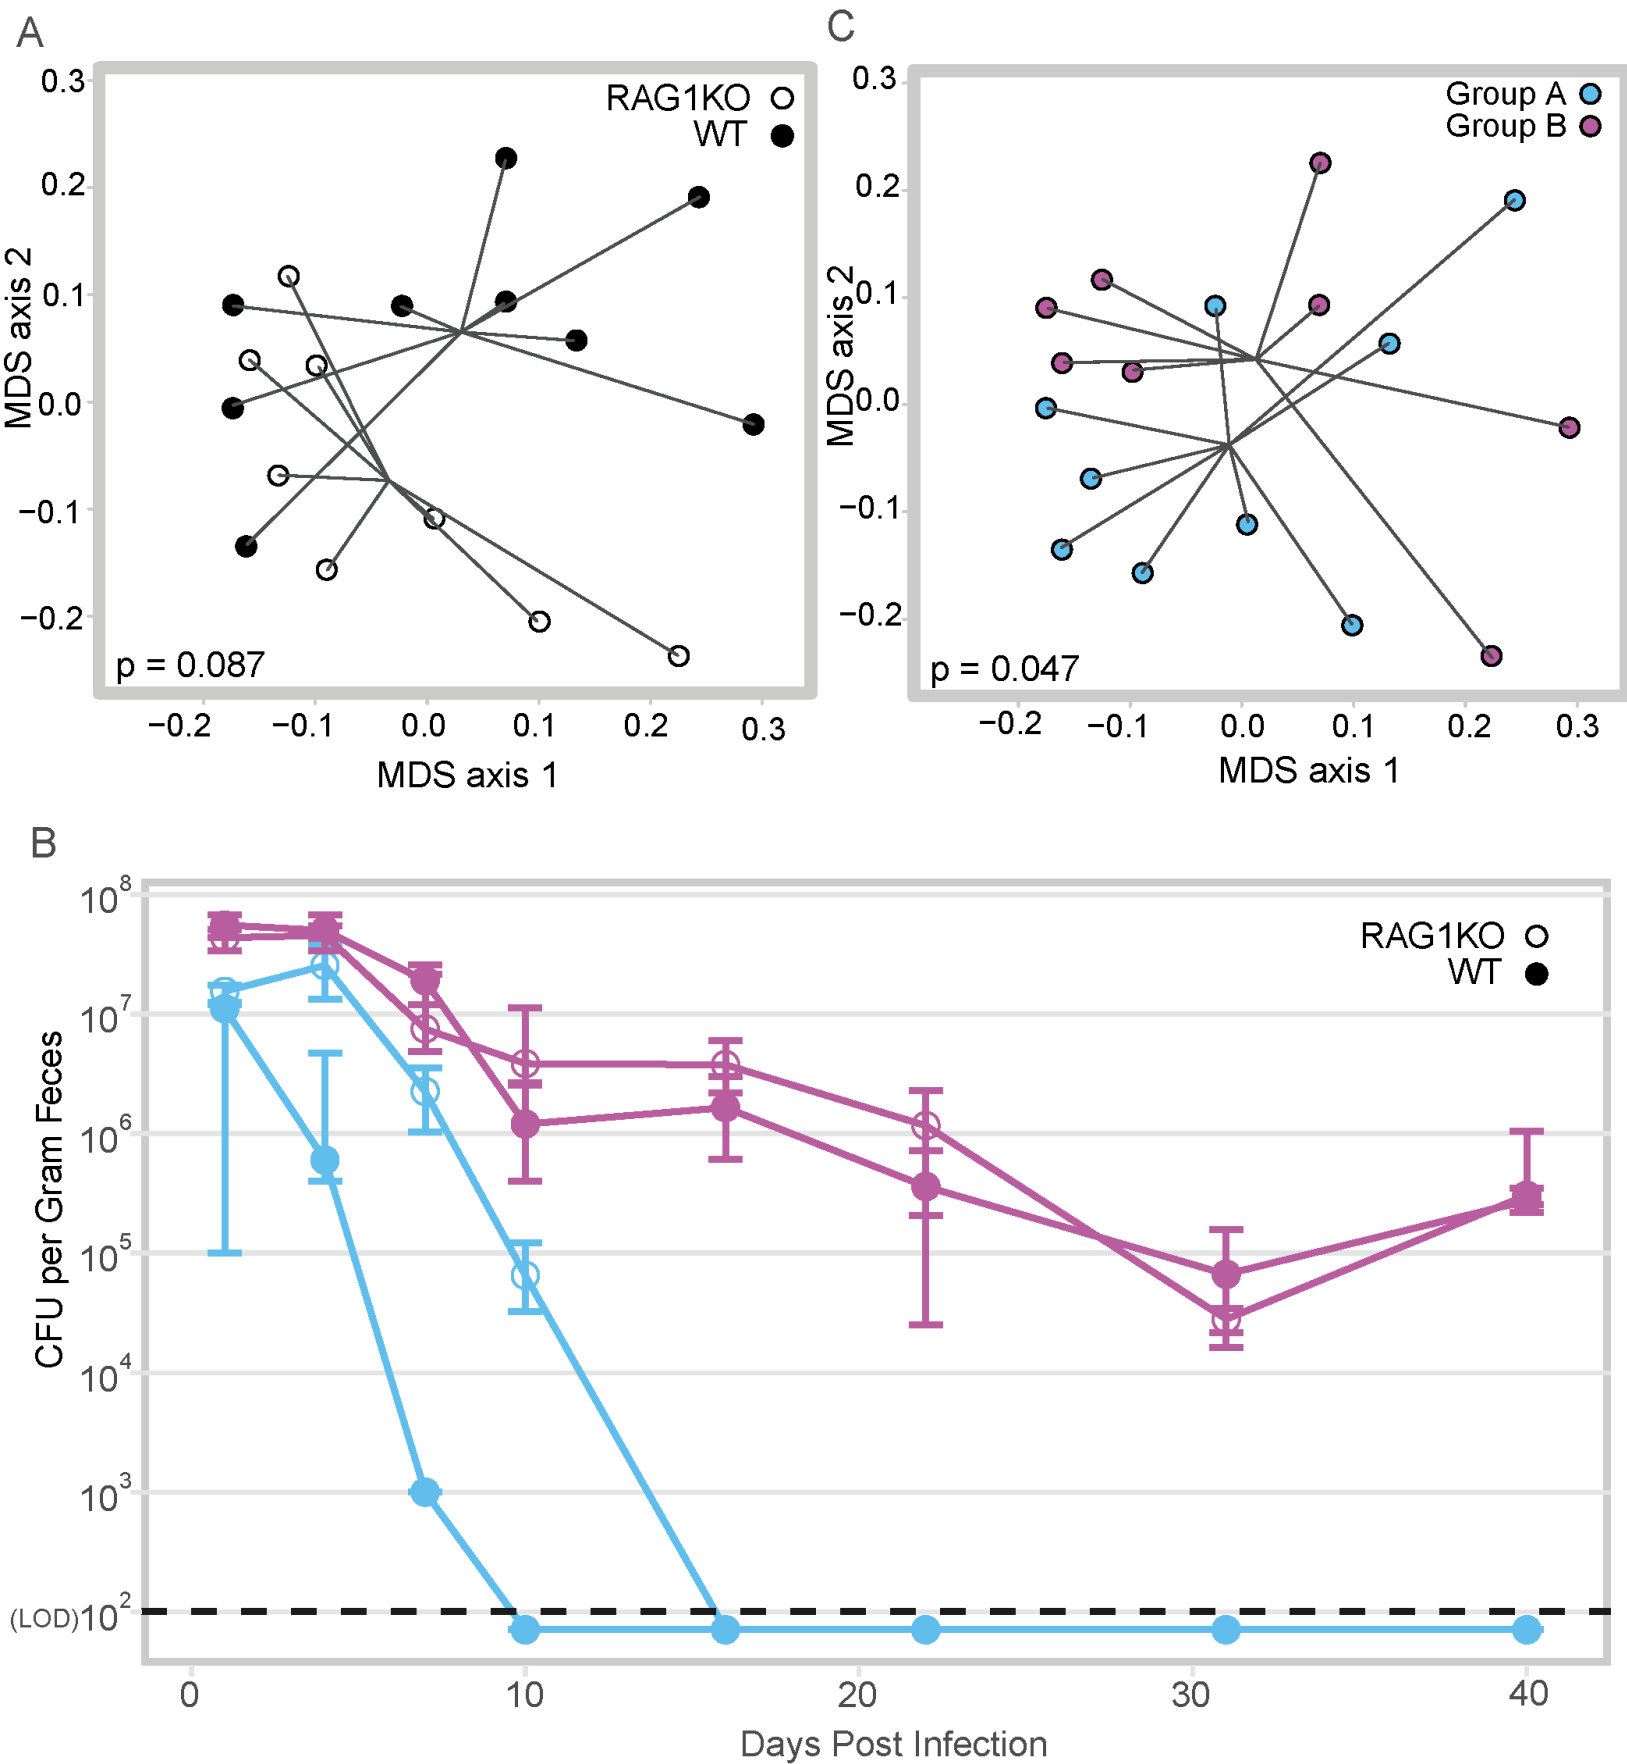

A

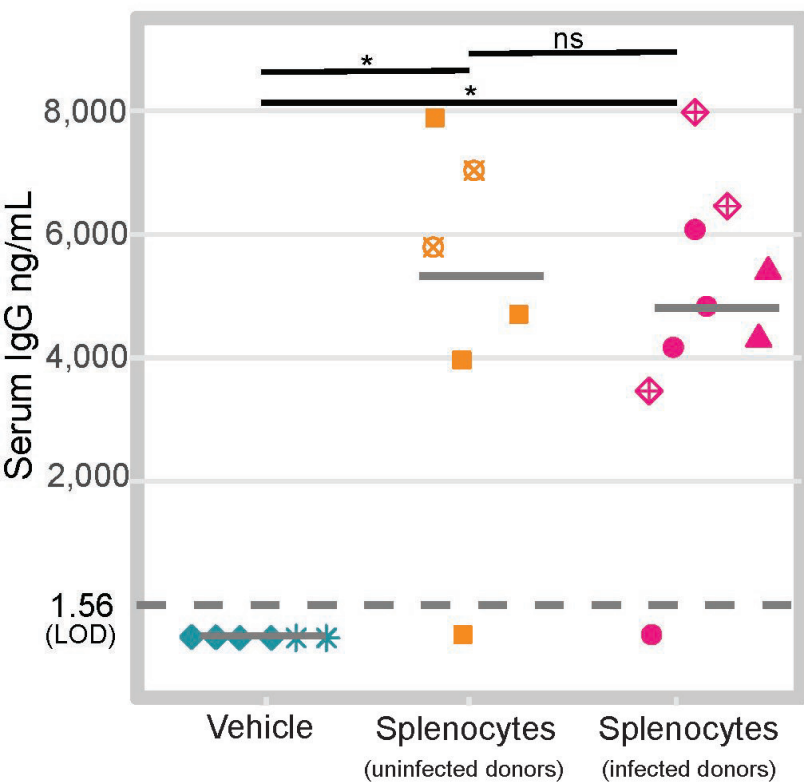

B

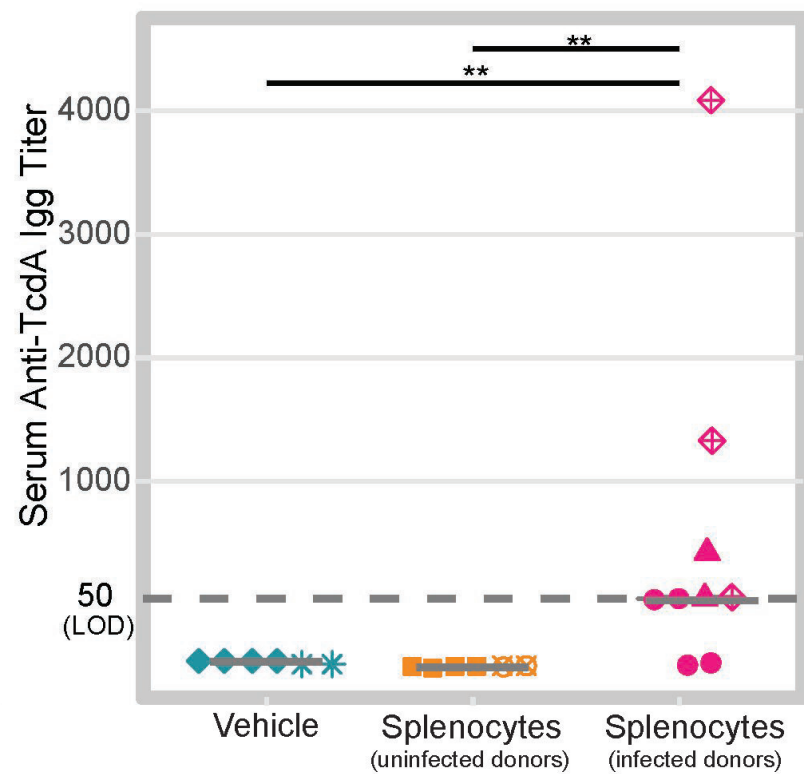

C

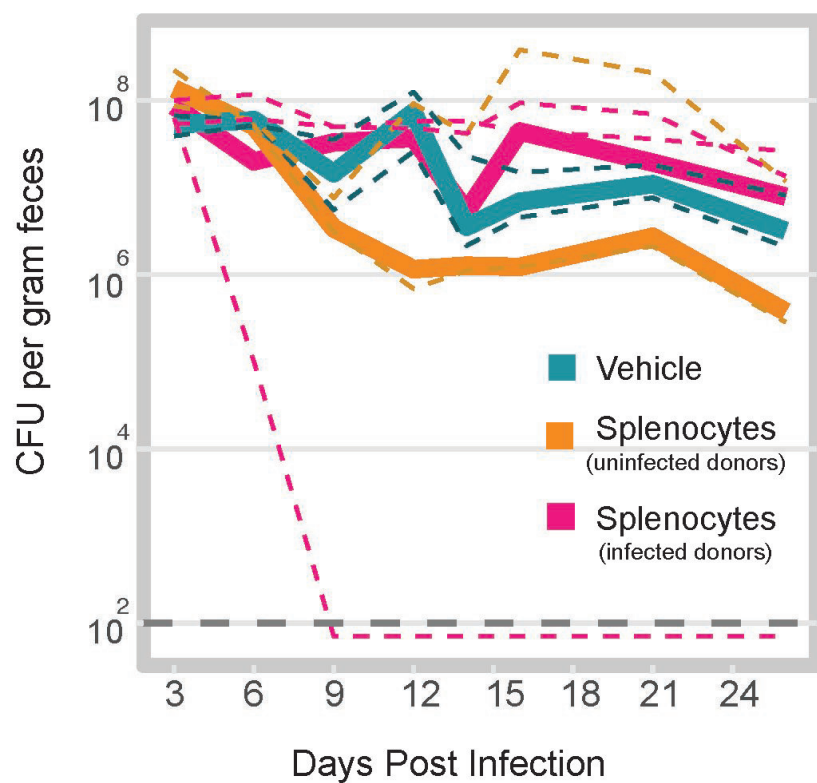

D

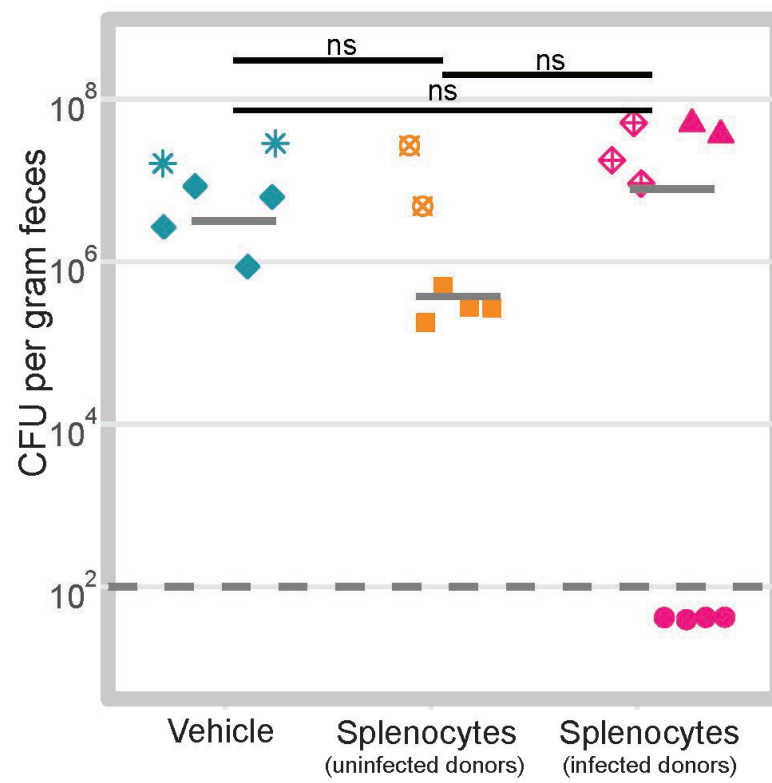



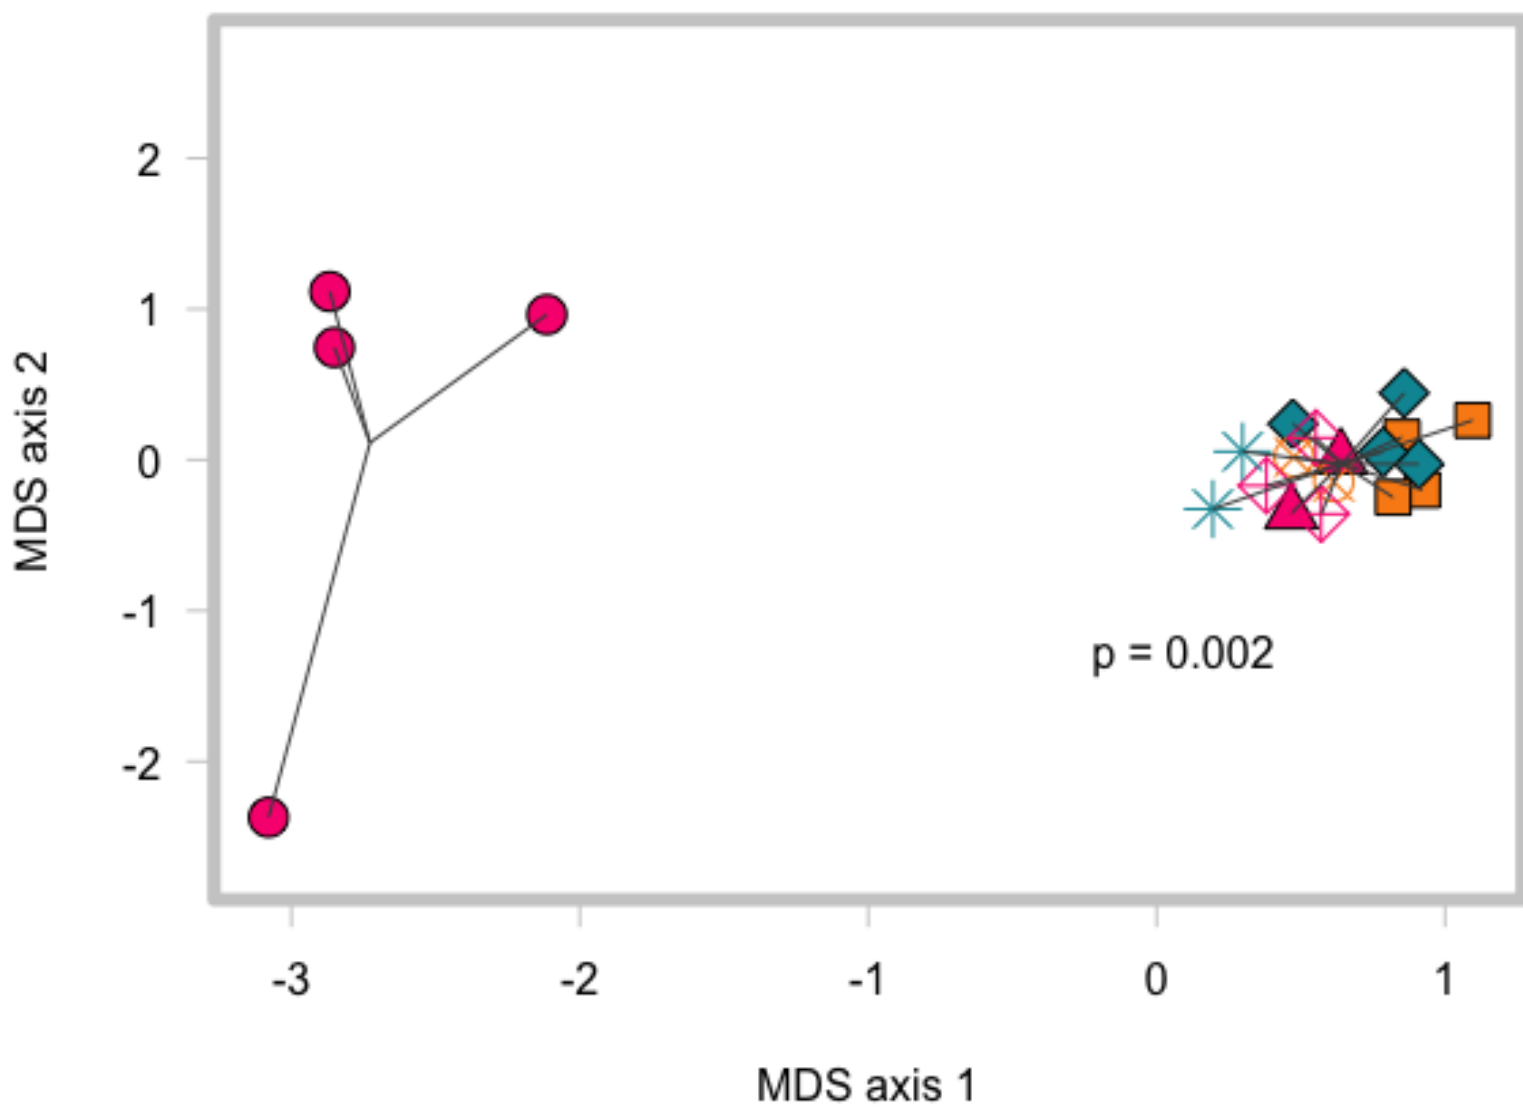

A

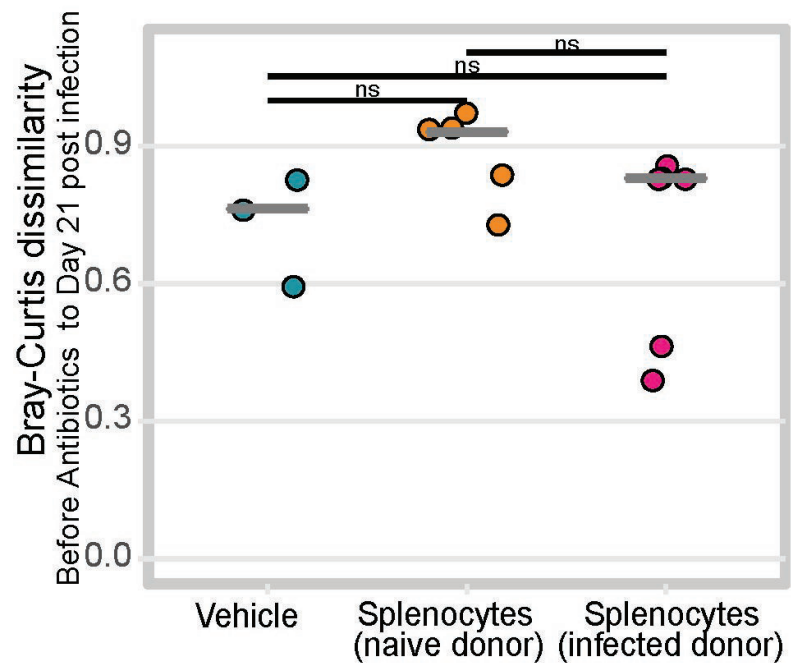

B

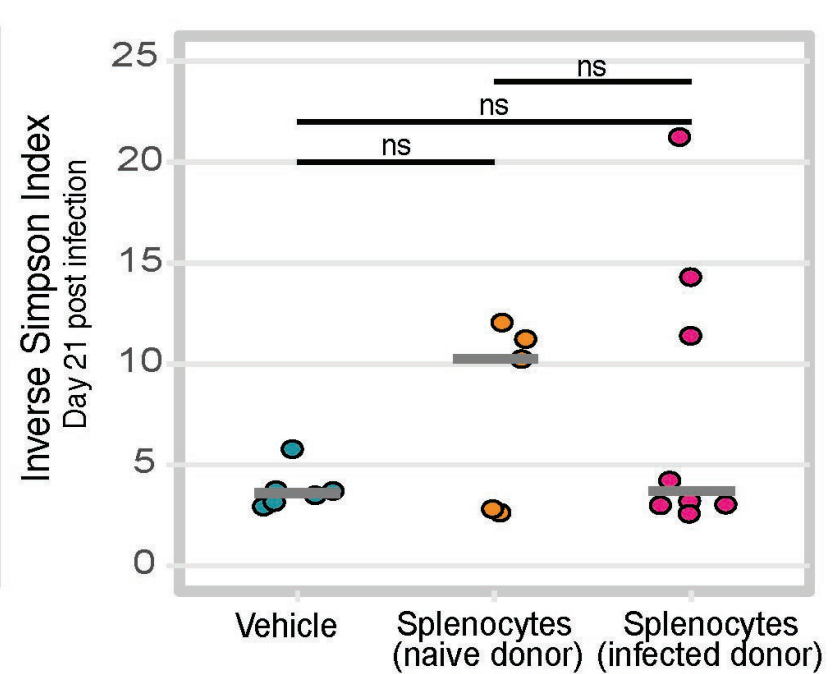

C

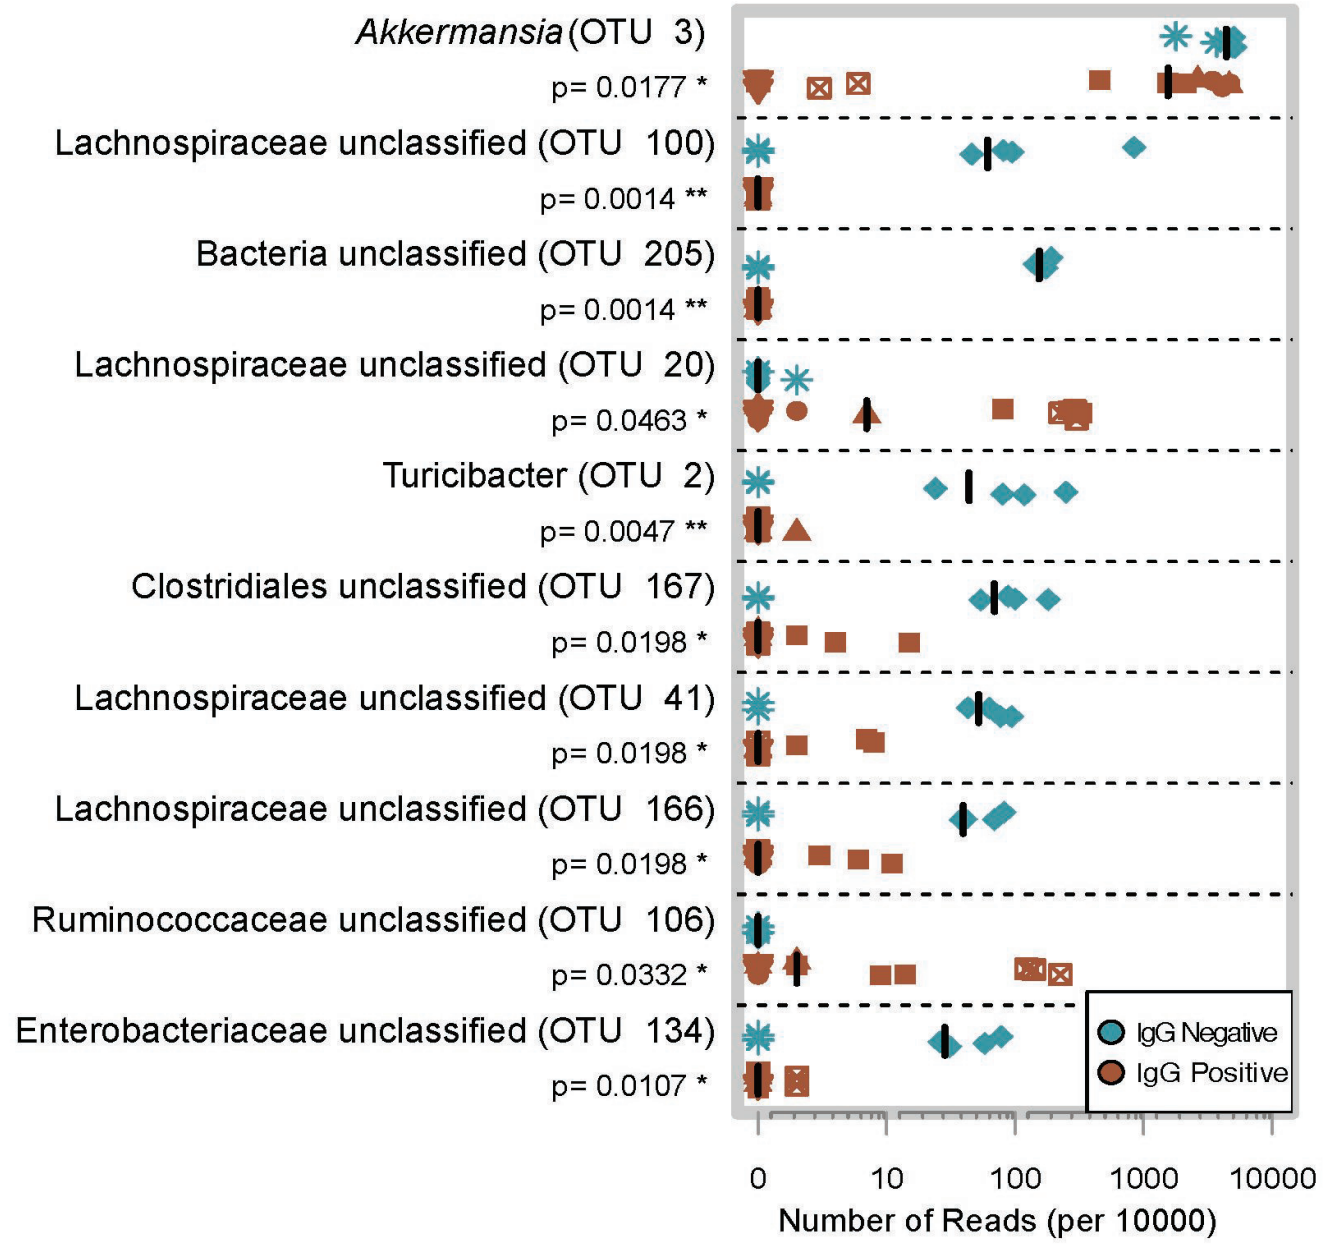

# Lachnospiraceae unclassified

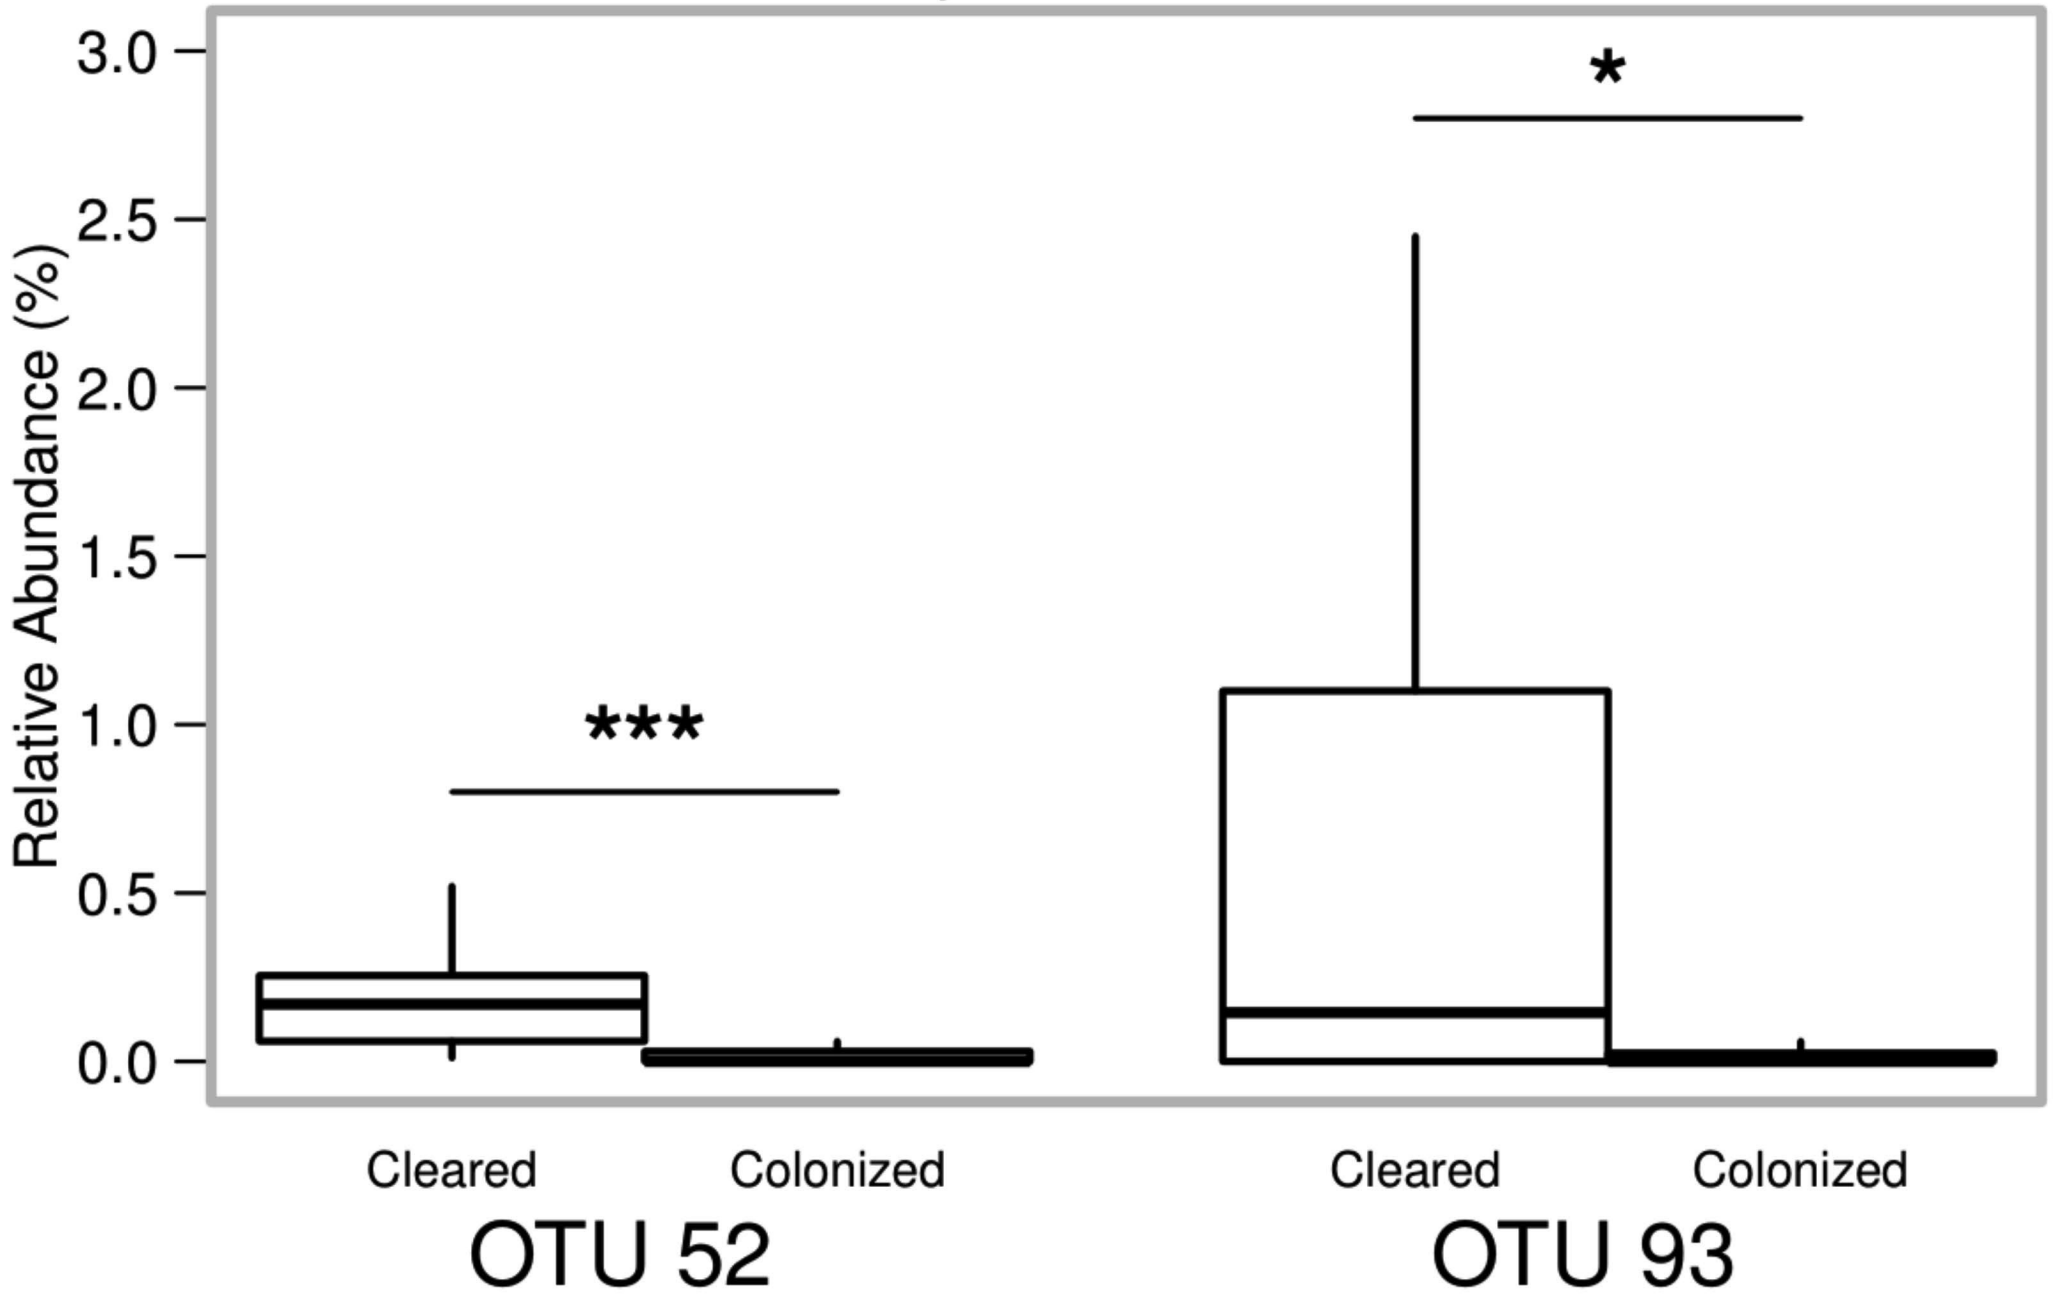

Source: https://www.biorxiv.org/content/10.1101/512616v1.full.pdf
